# Supplementary material for: Rainfall erosivity factor in the Czech Republic and its Uncertainty
Source: Copernicus journal article supplement (doi:10.5194/hess-2016-158), 2016-04-18
Supplement: Supplementary file [file hess-2016-158-AC3-supplement.zip]

# Rainfall erosivity factor in the Czech Republic and its uncertainty

## Supplementary material

Martin Hanel<sup>1, 2</sup>, Petr Máca<sup>1</sup>, Petr Bašta<sup>1</sup>, Radek Vlnas<sup>1</sup>, and Pavel Pech<sup>1</sup>

<sup>1</sup>Faculty of Environmental Sciences, Czech University of Life Sciences, Kamýcká 1176, Prague 6, Czech Republic

<sup>2</sup>T. G. Masaryk Water Research Institute, Podbabská 30, Prague 6, Czech Republic

Correspondence to: Martin Hanel (hanel@fzp.czu.cz)

In table 1 we provide following information on the station data used in our study:

|                |                                                                                                  |
|----------------|--------------------------------------------------------------------------------------------------|
| <b>ID</b>      | Station ID                                                                                       |
| <b>Name</b>    | Station name                                                                                     |
| <b>Missing</b> | List of missing years in the considered period (1989-2003)                                       |
| <b>x</b>       | longitude [m] in the Czech S-42 - Pulkovo 1942/Gauss-Krüger zone 3 projection                    |
| <b>y</b>       | latitude [m] (same projection)                                                                   |
| <b>z</b>       | altitude [m]                                                                                     |
| <b>r.cv</b>    | coefficient of variation of monthly May–September precipitation [-]                              |
| <b>r.p95</b>   | mean fraction of precipitation above the 95% quantile of monthly May–September precipitation [-] |
| <b>r.mea</b>   | average May–September precipitation [mm]                                                         |
| <b>R</b>       | R-factor [ $\text{MJ ha}^{-1} \text{ mm h}^{-1}$ ]                                               |

Table 1: Overview of 96 stations used within the study.

| ID       | Name                     | Missing        | x       | y       | z   | r.cv | r.p95 | r.mea | R   |
|----------|--------------------------|----------------|---------|---------|-----|------|-------|-------|-----|
| B1BYSH01 | Bystřice pod Hostýnem    | 1989,1990      | 3693606 | 5477142 | 317 | 0.68 | 0.16  | 85.79 | 960 |
| B1LUHA01 | Luhačovice               |                | 3701515 | 5445226 | 254 | 0.59 | 0.14  | 75.88 | 597 |
| B2BTUR01 | Brno                     | 2001,2002,2003 | 3623200 | 5448123 | 241 | 0.57 | 0.13  | 58.61 | 473 |
| B2BYSP01 | Bystřice nad Pernštejnem |                | 3590518 | 5487750 | 573 | 0.51 | 0.13  | 65.25 | 688 |
| B2BZAB01 | Brno                     |                | 3614220 | 5454973 | 236 | 0.59 | 0.13  | 60.95 | 810 |
| B2DUKO01 | Dukovany                 | 1989,1990      | 3582847 | 5440997 | 400 | 0.57 | 0.14  | 55.53 | 411 |
| B2JEVI01 | Jevišovice               |                | 3571800 | 5429353 | 330 | 0.61 | 0.15  | 56.03 | 557 |
| B2KMYS01 | Kostelní Myslová         |                | 3532034 | 5447610 | 569 | 0.55 | 0.13  | 67.19 | 812 |
| B2KUCH01 | Kuchařovice              |                | 3579681 | 5417225 | 334 | 0.55 | 0.13  | 58.65 | 511 |
| B2LEDN01 | Lednice                  | 1989,1990      | 3632300 | 5408262 | 177 | 0.62 | 0.15  | 60.55 | 543 |
| B2MBUD01 | Moravské Budějovice      | 1989,1990      | 3559087 | 5435531 | 457 | 0.58 | 0.14  | 61.89 | 807 |
| B2NEDV01 | Nedvězí                  | 1989,1990      | 3594610 | 5501103 | 722 | 0.64 | 0.15  | 74.07 | 648 |

Table 1: Overview of 96 stations used within the study.

| ID       | Name                   | Missing        | x       | y       | z    | r.cv | r.p95 | r.meas | R    |
|----------|------------------------|----------------|---------|---------|------|------|-------|--------|------|
| B2POHO01 | Pohořelice             |                | 3611029 | 5428329 | 183  | 0.61 | 0.14  | 56.40  | 547  |
| B2VIRP01 | Vír                    |                | 3595050 | 5493301 | 473  | 0.53 | 0.12  | 66.67  | 552  |
| B2VRAN01 | Vranov nad Dyjí        |                | 3560012 | 5419548 | 354  | 0.56 | 0.14  | 61.98  | 485  |
| B2ZIDL01 | Židlochovice           |                | 3617696 | 5435108 | 180  | 0.63 | 0.15  | 55.89  | 550  |
| C1BLAT01 | Blatná                 | 1989,1990      | 3418261 | 5478459 | 452  | 0.50 | 0.12  | 65.08  | 595  |
| C1CHAN01 | Chanovice              | 1989,1990      | 3407054 | 5475145 | 533  | 0.55 | 0.13  | 73.36  | 768  |
| C1CHUR01 | Churáňov               |                | 3398796 | 5438180 | 1117 | 0.52 | 0.13  | 101.27 | 859  |
| C1KEST01 | Kestřany               | 1989,1990      | 3432578 | 5459888 | 381  | 0.55 | 0.14  | 64.62  | 791  |
| C1ORLV01 | Orlík nad Vltavou      | 1989,1990      | 3439800 | 5485721 | 429  | 0.59 | 0.14  | 65.25  | 606  |
| C1STRA01 | Strakonice             | 1989,1990      | 3421679 | 5458175 | 427  | 0.53 | 0.12  | 68.72  | 633  |
| C1TEME01 | Temelín                |                | 3452036 | 5451865 | 503  | 0.60 | 0.14  | 70.12  | 808  |
| C1VIMP01 | Vimperk                | 1989,1990      | 3411022 | 5437113 | 657  | 0.56 | 0.13  | 81.85  | 849  |
| C2BORK01 | Borkovice              |                | 3473586 | 5452987 | 419  | 0.49 | 0.12  | 70.39  | 626  |
| C2CBUD01 | České Budějovice       | 1989,1990      | 3460986 | 5425836 | 388  | 0.66 | 0.16  | 77.04  | 955  |
| C2CERN01 | Černovice              | 1989,1990      | 3497276 | 5469418 | 580  | 0.54 | 0.13  | 81.24  | 691  |
| C2PVES01 | Pohorská Ves           |                | 3472979 | 5390801 | 745  | 0.71 | 0.17  | 100.46 | 1000 |
| C2TREB01 | Třeboň                 |                | 3483309 | 5441883 | 423  | 0.53 | 0.13  | 73.03  | 728  |
| H1BILA01 | Bílá Třemešná          | 1989,1990      | 3554447 | 5592081 | 322  | 0.54 | 0.13  | 65.52  | 362  |
| H2DEST01 | Deštné v Orlic. horách | 2001,2002,2003 | 3596308 | 5575866 | 656  | 0.61 | 0.15  | 104.83 | 1108 |
| H2NEKO01 | Nekoř                  | 1989,1990      | 3611808 | 5550321 | 488  | 0.54 | 0.13  | 84.32  | 763  |
| H2RYCH01 | Rychnov nad Kněžnou    | 1989,1990,2003 | 3590742 | 5560002 | 335  | 0.57 | 0.13  | 75.97  | 807  |
| H2USTI01 | Ústí nad Orlicí        |                | 3602007 | 5539655 | 402  | 0.58 | 0.14  | 76.73  | 670  |
| H3HERM01 | Heřmanův Městec        | 1989,1990      | 3548408 | 5534944 | 275  | 0.56 | 0.12  | 72.48  | 615  |
| H3LITM01 | Litomyšl               | 1989,1990,2003 | 3594702 | 5526693 | 351  | 0.60 | 0.14  | 73.11  | 496  |
| H3SVRA01 | Svratouch              |                | 3574512 | 5511915 | 737  | 0.63 | 0.14  | 83.40  | 626  |
| H3TRST01 | Trstěnice              | 1989,1990      | 3596557 | 5520262 | 420  | 0.70 | 0.16  | 75.50  | 811  |
| L1DNES01 | Dnešice                |                | 3374745 | 5498021 | 363  | 0.57 | 0.13  | 62.76  | 503  |
| L1HOJS01 | Železná Ruda           |                | 3368651 | 5454858 | 867  | 0.54 | 0.13  | 111.18 | 987  |
| L1PLZM01 | Plzeň                  |                | 3382936 | 5512582 | 335  | 0.58 | 0.13  | 60.10  | 401  |
| L2KONL01 | Konstantinovy Lázně    | 2002,2003      | 3354532 | 5530021 | 527  | 0.54 | 0.13  | 56.89  | 404  |
| L2KRAU01 | Krásné Údolí           |                | 3351481 | 5550940 | 642  | 0.55 | 0.13  | 61.66  | 468  |
| L2LEST01 | Lestkov                |                | 3347228 | 5530101 | 595  | 0.50 | 0.11  | 60.17  | 369  |
| L2PRIM01 | Přimda                 | 2001,2002      | 3332398 | 5506699 | 742  | 0.47 | 0.12  | 69.61  | 364  |
| L2STRI01 | Stříbro                |                | 3355704 | 5515488 | 412  | 0.59 | 0.13  | 59.35  | 524  |
| L2ZBIR01 | Zbiroh                 |                | 3410292 | 5525465 | 480  | 0.59 | 0.13  | 69.18  | 509  |

Table 1: Overview of 96 stations used within the study.

| ID       | Name                   | Missing        | x       | y       | z      | r.cv | r.p95 | r.meas | R    |
|----------|------------------------|----------------|---------|---------|--------|------|-------|--------|------|
| L3CHEB01 | Cheb                   | 2001,2002,2003 | 3313231 | 5551773 | 483    | 0.44 | 0.11  | 60.90  | 341  |
| L3FRAL01 | Františkovy Lázně      |                | 3310579 | 5557222 | 435    | 0.50 | 0.13  | 59.57  | 559  |
| L3KVAL01 | Karlovy Vary           |                | 3351013 | 5565423 | 603    | 0.47 | 0.12  | 59.97  | 399  |
| L3PREB01 | Přebuz                 |                | 3330843 | 5584029 | 889    | 0.53 | 0.13  | 93.19  | 534  |
| O1CERV01 | Červená                |                | 3683076 | 5519195 | 749    | 0.59 | 0.14  | 82.67  | 713  |
| O1HODS01 | Hodslavice             | 1989,1990      | 3718997 | 5494915 | 340    | 0.70 | 0.16  | 91.05  | 779  |
| O1JABL01 | Jablunkov              | 1989,1990      | 3770669 | 5502444 | 378    | 0.66 | 0.16  | 113.39 | 945  |
| O1PORU01 | Ostrava                | 1989,1990      | 3727318 | 5526234 | 238.60 | 0.62 | 0.15  | 83.66  | 951  |
| O1RASK01 | Raškovice              | 1989,1990      | 3750488 | 5507170 | 391    | 0.62 | 0.15  | 119.88 | 1523 |
| O1RYMA01 | Rýmařov                | 1989           | 3664075 | 5538310 | 645    | 0.50 | 0.12  | 79.11  | 710  |
| O1VITK01 | Vítkov                 | 1989,1990      | 3698809 | 5519629 | 489    | 0.67 | 0.15  | 77.26  | 589  |
| O2LUKA01 | Luká                   | 1989,1990      | 3641048 | 5504024 | 510    | 0.67 | 0.16  | 70.78  | 800  |
| O2STME01 | Staré Město            | 1989,1990,2003 | 3620902 | 5519394 | 408    | 0.68 | 0.16  | 67.97  | 662  |
| O3BECV01 | Horní Bečva            |                | 3739234 | 5482832 | 565    | 0.61 | 0.15  | 114.51 | 1043 |
| P1KRIV01 | Křivoklát              | 1993,1994      | 3419823 | 5545717 | 323    | 0.55 | 0.13  | 64.25  | 492  |
| P1NEUM01 | Neumětely              |                | 3430763 | 5524984 | 322    | 0.58 | 0.14  | 61.55  | 408  |
| P1PKLM01 | Praha                  |                | 3458439 | 5551140 | 191    | 0.53 | 0.12  | 54.68  | 350  |
| P1PKOM01 | Praha                  |                | 3457490 | 5539746 | 210    | 0.56 | 0.13  | 59.79  | 462  |
| P1PRUZ01 | Praha                  |                | 3446900 | 5552355 | 364    | 0.49 | 0.11  | 57.65  | 365  |
| P1PUHR01 | Praha                  |                | 3471600 | 5544535 | 299    | 0.54 | 0.13  | 67.05  | 520  |
| P2BRAN01 | Brandýs nad Labem-St.B | 2003           | 3475764 | 5562034 | 179    | 0.52 | 0.11  | 65.97  | 708  |
| P2DESN01 | Desná                  | 2003           | 3522511 | 5628770 | 772    | 0.55 | 0.14  | 108.42 | 794  |
| P2HARR01 | Harrachov              | 2003           | 3530730 | 5626865 | 670    | 0.53 | 0.13  | 104.07 | 764  |
| P2NVES01 | Káraný                 | 2003           | 3480872 | 5560534 | 170    | 0.52 | 0.11  | 59.07  | 462  |
| P2SEMC01 | Semčice                | 1994,2003      | 3500315 | 5581723 | 234    | 0.50 | 0.11  | 64.51  | 594  |
| P3BOHD01 | Bohdaneč               |                | 3516127 | 5516276 | 460    | 0.51 | 0.12  | 74.78  | 726  |
| P3HAVL01 | Havlíčkův Brod         |                | 3541896 | 5497872 | 455    | 0.55 | 0.13  | 77.45  | 724  |
| P3KOSE01 | Košetice               | 2002,2003      | 3505765 | 5493421 | 534    | 0.50 | 0.12  | 69.85  | 576  |
| P3NRYC01 | Nový Rychnov           |                | 3526501 | 5472628 | 624    | 0.49 | 0.13  | 80.62  | 799  |
| P3ONDR01 | Ondřejov               |                | 3484535 | 5530578 | 485    | 0.59 | 0.14  | 73.02  | 697  |
| P3PRIB01 | Přibyslav              |                | 3555140 | 5494753 | 530    | 0.51 | 0.13  | 74.50  | 610  |
| P3STAN01 | Vavřinec               |                | 3504872 | 5530069 | 415    | 0.52 | 0.12  | 67.99  | 468  |
| U1BLSA01 | Blšany                 |                | 3390546 | 5566132 | 290    | 0.52 | 0.12  | 52.40  | 350  |
| U1JIRK01 | Otvice                 | 1994           | 3389790 | 5595547 | 325    | 0.60 | 0.15  | 53.82  | 742  |
| U1KOPI01 | Kopisty                | 2001,2002,2003 | 3402419 | 5602319 | 240    | 0.53 | 0.12  | 51.30  | 324  |

Table 1: Overview of 96 stations used within the study.

| ID       | Name                  | Missing        | x       | y       | z   | r.cv | r.p95 | r.meas | R    |
|----------|-----------------------|----------------|---------|---------|-----|------|-------|--------|------|
| U1LOUN01 | Louny                 |                | 3416045 | 5580843 | 230 | 0.52 | 0.12  | 55.88  | 360  |
| U1MEDE01 | Měděnec               |                | 3367232 | 5590313 | 828 | 0.50 | 0.12  | 76.52  | 809  |
| U1NOVE01 | Nová Ves v Horách     |                | 3392769 | 5607915 | 725 | 0.52 | 0.13  | 82.39  | 550  |
| U1SNEZ01 | Sněžník               | 1995           | 3435394 | 5629991 | 567 | 0.52 | 0.12  | 80.99  | 588  |
| U1ULKO01 | Ústí nad Labem        |                | 3432234 | 5617392 | 375 | 0.50 | 0.11  | 63.15  | 356  |
| U1ULMA01 | Ústí nad Labem        | 1990,1997,1998 | 3433409 | 5610891 | 150 | 0.51 | 0.12  | 61.43  | 381  |
| U1ZATE01 | Žatec                 |                | 3396797 | 5580572 | 210 | 0.53 | 0.12  | 53.47  | 431  |
| U2BEDR01 | Bedřichov             | 1995           | 3509672 | 5631545 | 777 | 0.55 | 0.13  | 115.17 | 710  |
| U2CELI01 | Česká Lípa            | 1996           | 3467642 | 5616096 | 252 | 0.52 | 0.12  | 63.47  | 443  |
| U2CHRI01 | Chřibská              |                | 3466511 | 5635783 | 440 | 0.48 | 0.12  | 84.26  | 580  |
| U2DOKY01 | Doksy                 | 2003           | 3476446 | 5604124 | 284 | 0.48 | 0.10  | 69.65  | 595  |
| U2JAPO01 | Jablonné v Podještědí |                | 3484110 | 5626766 | 320 | 0.57 | 0.13  | 71.38  | 468  |
| U2NMES01 | Nové Město pod Smrkem |                | 3516450 | 5643488 | 473 | 0.54 | 0.13  | 106.23 | 1067 |
| U2VARN01 | Varnsdorf             |                | 3472298 | 5642023 | 365 | 0.53 | 0.12  | 73.65  | 477  |
